# Supplementary material for: Experiences with the implementation of Individual Placement and Support for people with severe mental illness: a qualitative study among stakeholders
Source: BMC Psychiatry. 2018 May 24;18:145. doi: 10.1186/s12888-018-1729-4 (PMC5968490; doi:10.1186/s12888-018-1729-4)
Supplement: Supplementary file 2 — Experiences with the implementation of Individual Placement and Support for people with severe mental illness: a qualitative study among stakeholders. Table S2. Thematic overview of perceived facilitators and barriers. (XLSX 27 kb) [file 12888_2018_1729_MOESM2_ESM.xlsx]

## Sheet: Blad1
	Table 2. Thematic overview of facilitators and barriers.
	Main theme	Subtheme			Facilitators	Barriers
	Innovation	IPS
			Intervention		Proven effectiveness of IPS	Low number of IPS applicants
					Added value of IPS for the target group	IPS is not perceived as consistent with existing work procedures
					IPS model fidelity: high fidelity IPS services are expected to be more effective; a good score is a condition for IPS funding	Costs of IPS (expensive intervention)
						IPS model fidelity (also listed as a barrier: some criteria of the IPS model fidelity scale are experienced as rigid and outdated; also the fidelity reviews are conducted by the training organization)
			Target group		Clearly defined criteria for the target group	Difficult target group: vulnerability of people with SMI; people with SMI are at a significant distance to the labour market
					High costs for the benefit agencies and health insurance company incurred by the target group	Stigmatization of people with SMI
		Collaboration between organisations
			Between organizations involved		Regular contact persons	Clients' privacy and medical confidentiality
				- At the start	Short decision lines and fast response	Lack of involvement of practitioners in vocational rehabilitation: mental health care instrument, few IPS applicants, limited substantive input
					Structural consultation	Lack of information; need for more information about IPS action plan and interim progress and results of IPS services
					Sharing information and knowledge/ expertise	Organization of the structural meetings: absent professionals, lack of preparation, structure and continuilty; too many practitioners/ decission makers involved
				- In a later phase	Trust between professionals (e.g. rely on the judgement of IPS specialist regarding IPS indicatie)	Lack of formal, written information about collaboration between the organizations (e.g. regarding professionals' role distribution, rules regarding clients' benefits and IPS services)
					Periodic evaluation moments	At management levell it's not clear what the obstacles for practitioners are and practitioners don't know about the management meetings; need for better communication between management and practitioners
					Shared interests, goals and vision
					Existing contact persons and collaboration
					Informal, face to face contact between professionals
					Open communication between professionals
					Professionals' insight in each others perspectives and organizations/ knowing each other/ trust between professionals
					Less costs for medical expertise for benefit agency (municipality)
			Within organizations involved
				- Organization characteristics	Relationship with other organizations: outreaching
						Relationship with other organizations: introvert
						Rigid structure and policies
				- Culture	Focus on IPS and collaboration
					Support of collegues	Lack of support of other professionals in mental health care/ lack of involvement psychiatrists and other therapists
					Structural consultation about IPS and collaboration within the organization	Lack of support of the department manager
					Formal reinforcement by management to integrate IPS into organizational policies/ support of the board of directors
				- Conditions and continuity	Time availible for IPS and structural consultation
					Adequate IPS training	Lack of staff capacity
						Small number of professionals involved with the innovation (IPS and collaboration)
						High work load among practitioners in vocational rehabilitation
						Duration to start IPS training
						Lack of acquaintance with and knowledge of IPS within organizations/ among practitioners in vocational rehabilitation
						Lack of knowledge of employer services and benefits among IPS coaches
						Lack of knowledge transfer and inadequate communication and collaboration within organizations (benefit agencies)
						Lack of administrative support within organizations
					High staff turnover: other professional comes who beliefs in IPS	High staff turnover: professional who beliefs in IPS leaves the organization
					Reorganisation: other professionals in charge	Reorganisation: professionals don't know what their role and tasks are; decrease in financial recourses; less priority for IPS
			Professionals involved
				- Professional charecteristics	Mandate and influence
					Opinion leader
					Affinity with target group
						IPS not experienced as part of the mental health treatment by health care professionals within multidisciplinary treatment teams resulting in restraint regarding emloyment and reffering clients to an IPS specialist
				- Attitude en beliefs	IPS experienced as a part of the mental health treatment by IPS specialists and practitioners in vocational rehabilitation	Belief among professionals within benefit agencies that people with SMI are (theoretically) completely unable to work
					Passionate and enthousiastic professionals	Doubting effectiveness and added value of IPS
					Belief in effectiveness and added value of IPS
					Ownership regarding IPS and collaboration
		IPS funding
			Funding
						Limited and fragmented funding; different financial agreements between organizations (e.g. ammount of money); need for one IPS funding for all clients
						Administrative burden for IPS specialists is still existing (because of fragmented funding)
				- Financial agreements	Substantial funding for IPS	Lack of clarity regarding costs of IPS services
				Ethics		Not appropriate/ effective in the mental health care setting: hardly felt in practice; small amount of money; financial reward for the organization; IPS is a part of the mental health treatmant, making profit is not a goal
				- Pay for performance		No influence on IPS specialist; they have other motivation (clients' and employers' interesent most important)
					Appropriate part of the funding	Pervese incentive: more critically regarding IPS indication and closing IPS services
					Influences IPS specialists in a positive way; motivation; working harder
			Ethics
						Adaptation of financial agreements to target group (also listed as a barrier because adaptation can prefer one target group at the expense of others)
						Access to IPS for a client with SMI receiving social assistance benefits depends on the municipality in wich the client resides: IPS funding is limited to residents of Amsterdam (no zero exclusion)
					Adaptation of financial agreements to target group
			Sustainability
						Lack of proven cost-effectiveness of IPS ; need for proven cost-effectiveness at benefit agencies and health insurance company in order to continue funding
						Temporary financial agreements between the organizations involved
					Number of organizations/ financiers involved: the more the better
	Socio-political context	Covenants			Between SSA and mental health care provider
					Between health insurance company and municipality
		Legislation
			Participation act		Increased cooperation between organizations involved	Negative changes in IPS funding : less funding for people with a social assistance benefit
					Sense of urgency regarding participation of people with SMI	Negative influence on clients
					Inclusive employers	Decentralization: increased influence of the mulicipalities regarding participation policies
					Positive for people with SMI
					Realization of IPS funding
		Government			Support Ministry of Social Affairs and Employment; extra funding	Health care insurance act: limits funding of IPS by health insurance company
					Suppoort Ministry of Public Health, Welfare and Sport	Social safety net: partly takes away the incentive for clients to do paid work
					Support councillor	Mental health care organization: transition from specialist mental health to basic mental health care in which IPS services are not deliverd (not according to the IPS model fidelity scale criteria)
		Client attitude			Desire to work and enroll in IPS
						Fear of losing benefit and privacy
						Administrative burden for the client (e.g. sending pay slips weekly)
							#VALUE!

## Sheet: Blad2
	Table 2 Thematic overview of perceived facilitators and barriers
	Theme				Facilitators			Barriers
	1. Innovation
		1.1 IPS
			Intervention		Evidence based effectiveness of IPS			Costs of IPS
						Proven effective intervention			Expensive intervention
					Key principles of the IPS model			IPS model fidelity scale and fidelity reviews
						High fidelity IPS services are expected to be more effective			Some criteria of the IPS model fidelity scale are experienced as rigid
									Fidelity reviews are conducted by the IPS training organization; fidelity reviewers of this
									organization are not considered independent
								Compatibility of IPS with existing work procedures
									IPS is not perceived as consistent with existing work procedures
									Low number of IPS applicants
			Target group		Defined target group			Difficult target group
						Clearly defined criteria of the target group, i.e. people with SMI			Vulnerability of people with SMI
									People with SMI have a significant distance to the labour market
									Stigmatization of people with SMI
					High existing costs of target group
						Potential financial profit for the financiers instead of usual high costs due to this target group
		1.2 Collaboration
			Between organizations involveda		Regular meetings of stakeholders			Clients' privacy and medical confidentiality
						Designated contact persons per organization
						Short decision lines and fast response of stakeholders involved
						Stimulate regular evaluation of new procedures
						Trust between stakeholders
							Improves experienced reliability of the judgement of other stakeholders
							Facilitates open communication between stakeholders
					Sharing information, knowledge and expertise			Organization of the structural meetings
						Lower costs for medical expertise for municipality			Absent stakeholders
									Lack of preparation, structure and continuity
					Pre-existing relationships and collaboration between stakeholders			Lack of involvement of practitioners in vocational rehabilitation
						Informal, face to face contact between stakeholders			Relatively few IPS applicants for benefit agencies
									IPS is considered as a mental health care instrument
										Lack of information about IPS action plan, interim progress and results of IPS services (outcome monitoring)
					Shared interests, goals and vision of stakeholders			Lack of communication between decision makers and practitioners
									At management level it is not clear what the obstacles for practitioners are
									Practitioners are not aware of the decisions made during management meetings
									No formal, written information available about responsibilities and roles of the different
									practitioners involved
			Within organizations involved
				Organization characteristics	Outreaching organisation			Introvert organisation
						Previous experience of organisation to collaborate				Lack of previous experience of organisation to collaborate change
										Rigid structure and policy of organisation to change
				Culture	Interest and focus on IPS of organisation
							Structural consultation about IPS and collaboration within the organization
					Support of supervisors
							Formal reinforcement by management to integrate IPS into organizational policies
							Support of the board of directors
				Conditions	Adequate availability of time to provide IPS services			Lack of availability IPS training
					Adequate IPS training			Lack of staff capacity
									High staff turnover
									High work load of practitioners
								Lack of adequate knowledge of IPS services within organization
									Inadequate knowledge transfer of IPS and agreements with other organizations
			Professionals involved
				Stakeholders characteristics	Mandate and influence of decision makers
							Opinion leaders
							Affinity with target group
				Attitude and beliefs	Ownership of IPS and collaboration			IPS not experienced as part of the mental health treatment
							Enthousiastic and passionate stakeholders		Doubting effectiveness and added value of IPS
								Work not experienced as a achievable goal for people with SMI
		1.3 IPS funding
			Secured fundingb		Substantial funding for IPS			Fragmented funding
									Different financial agreements between organizations (e.g. ammount of money)
								Lack of clarity with regard to costs of IPS services
			Ethics
				Pay for performanceb	Pay for performance might encourage IPS specialists			Not appropriate to receive extra payments within health care setting
									Perverse incentive: more critically with regard to IPS indication and closing IPS services
									Little influence on IPS specialists in daily practice
				Access to IPS				Limited availability of IPS for clients outside municipality of Amsterdam
			Sustainability		Covenant between involved organizations stimulates collaboration and funding			Lack of proven cost-effectiveness of IPS
								Temporary financial agreements between the organizations involved
	2. Socio-political context
			Government		Support and funding of Ministry of Social Affairs and Employment			Dutch social safety net does not stimulate participation in paid work
									Benefit trap (financial disincentives to work)
					New Participation Act provides sense of urgency regarding participation of people with SMI			New Participation Act has unwanted consequences
						Realization of IPS funding			Insecurity for people with SMI and organizations involved
						Positive for people with SMI			Decentralization: increased influence of the municipalities regarding participation policy
						Inclusive employers
								Health insurance act limits IPS funding by health insurance company
			Client attitude		Desire to work and enrol in IPS			Fear of losing benefit and privacy
								Administrative burden for the client
	aPart of the organizational implementation strategy. bPart of the financial implementation strategy.
